# Supplementary material
Source: publisher figshare collection journal article supplement (https://gsajournals.figshare.com/ndownloader/files/17930516)
Supplement: Supplementary file 1 [file 17930516]

| **Table S1** Analyses of variance on behavioral responses to BUT or CYC at multiple concentrations in the Flyland population. | | | | | |
| --- | --- | --- | --- | --- | --- |
| **Odorant** | **Term** | **df** | **S.S.** | ***F*** | ***P*** |
| BUT | Concentration | 4 | 15.3800 | 31.780 | **0.0001** |
| CYC | Concentration | 4 | 10.2400 | 14.990 | **0.0001** |
| Degrees of freedom (df), Sum of Squares (S.S.), *F* ratio (*F*), and *P*-value (*P*). | | | | | |
| Significant terms in bold. | | | | | |
